# Supplementary material for: Langerhans Cells Prevent Autoimmunity via Expansion of Keratinocyte Antigen-Specific Regulatory T Cells
Source: PubMed Central journal article supplement — eBioMedicine. 2017 Dec 20;27:293–303. doi: 10.1016/j.ebiom.2017.12.022 (PMC5828466; doi:10.1016/j.ebiom.2017.12.022), 2017-12-20
Supplement: mmc1.pdf [file mmc1.pdf]

Supplementary Table 1: Functional predictions for transcriptional changes in rIL-2-treated LCs.

| <b>Disease or Function Annotation</b>  | <b>p-Value</b> | <b>Predicted Activation State</b> | <b>z-Score</b> |
|----------------------------------------|----------------|-----------------------------------|----------------|
| function of lymphocytes                | 4.10E-175      | Decreased                         | -3.732         |
| function of lymphatic system cells     | 1.56E-179      | Decreased                         | -3.634         |
| function of mononuclear leukocytes     | 7.25E-178      | Decreased                         | -3.449         |
| function of T lymphocytes              | 4.07E-139      | Decreased                         | -3.443         |
| cytotoxicity of cells                  | 8.93E-117      | Decreased                         | -3.382         |
| cell-mediated response                 | 2.63E-112      | Decreased                         | -3.17          |
| function of blood cells                | 5.60E-220      | Decreased                         | -3.159         |
| toxicity of cells                      | 1.87E-118      | Decreased                         | -3.134         |
| cytotoxicity of leukocytes             | 1.09E-103      | Decreased                         | -3.038         |
| cytotoxicity                           | 1.31E-120      | Decreased                         | -3.038         |
| function of leukocytes                 | 1.70E-221      | Decreased                         | -2.974         |
| activation of antigen presenting cells | 8.34E-106      | Decreased                         | -2.733         |
| differentiation of Th1 cells           | 2.76E-51       | Decreased                         | -2.631         |
| activation of macrophages              | 1.91E-81       | Decreased                         | -2.516         |
| cytotoxicity of lymphatic system cells | 4.42E-99       | Decreased                         | -2.487         |
| cell death of tumor                    | 2.42E-59       | Decreased                         | -2.392         |
| necrosis of tumor                      | 1.42E-58       | Decreased                         | -2.392         |
| cell death of tumor cells              | 1.11E-54       | Decreased                         | -2.392         |
| cytotoxicity of lymphocytes            | 1.25E-96       | Decreased                         | -2.331         |
| apoptosis of tumor cells               | 3.43E-54       | Decreased                         | -2.238         |
| immune response of cells               | 4.65E-169      | Decreased                         | -2.221         |
| hypersensitive reaction                | 2.12E-88       | Decreased                         | -2.078         |
| activation of phagocytes               | 8.64E-130      | Decreased                         | -2.046         |
| cytotoxicity of T lymphocytes          | 4.80E-55       | Decreased                         | -2.041         |
| cell death of malignant tumor          | 4.06E-51       | Decreased                         | -2.013         |
| necrosis of malignant tumor            | 3.38E-50       | Decreased                         | -2.013         |
